# Supplementary material for: Dual mTOR/DNA-PK Inhibitor CC-115 Induces Cell Death in Melanoma Cells and Has Radiosensitizing Potential
Source: PubMed Central journal article supplement (PMC7730287; doi:10.3390/ijms21239321), 2020-12-07
Supplement: ijms-21-09321-s001.pdf [file ijms-21-09321-s001.pdf]

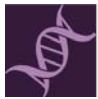

## Supplementary Material

### 1 Supplementary Figures

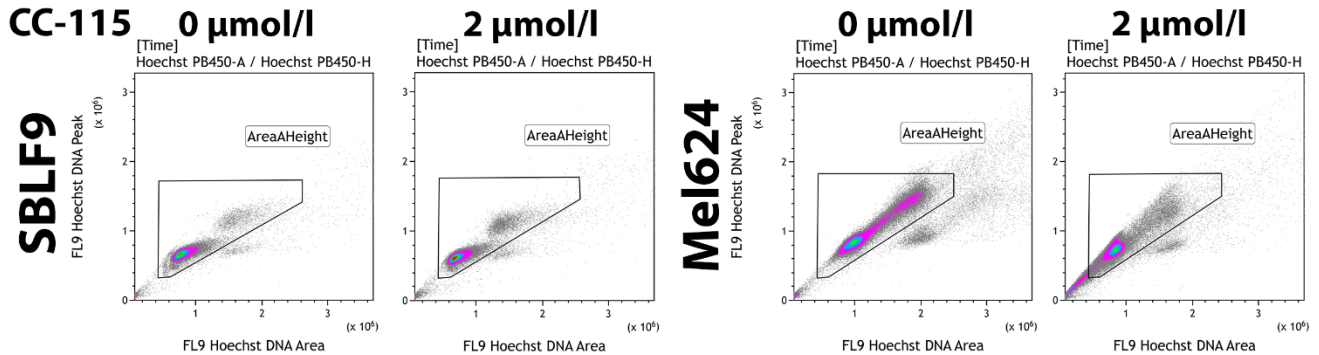

**Figure S1**

#### Figure S1: Gating strategy for cell cycle distribution

Flow cytometry was used for cell cycle analysis by Hoechst staining. Examples of representative data are displayed for healthy-donor skin fibroblasts (SBLF9) and melanoma cells (Mel624) for control and treatment with 2  $\mu\text{mol/l}$  CC-115. Graphs show DNA content Area plotted versus DNA content Height. Thereby doublets were excluded.
